# Supplementary material for: Diverse genetic contexts of HicA toxin domains propose a role in anti-phage defense
Source: PubMed Central journal article supplement (PMC10865869; doi:10.1128/mbio.03293-23), 2024-01-18

## **Supplemental Material**

### **Diverse Genetic Contexts of HicA Toxin Domains Propose a Role in Anti-Phage Defense**

**Kenn Gerdes**

## Legends of Supplementary Figures

### Figure S1. HicB of *E. coli* K-12 exhibits a partial RNase H fold.

(A) Comparison of experimental secondary structures of HicB of *E. coli* K-12 (P67697.2, upper) and *T. thermophilus* HB8 (BAD71735.1, lower).

(B) Tertiary structures of the N-terminal partial RNase H-like domain of HicB of *E. coli* K-12 (6HPB.pdb, left), TTHA1013 of *T. thermophilus* HB8 (1WV8.pdb, middle) and their superimposition (right) with an RMSD between 18 pruned atom pairs of 1.4Å. These structures were obtained experimentally ([1](#), [2](#)).

### Figure S2. Sequence alignments of Class 5 and 6 HicA.

(A) Alignment of Class 6 HicAs. The Shared Domain is indicated with a bar.

(B) Alignment of Class 5 and 6 HicAs. Class 5 HicAs are typical small, mono-domain proteins with a dsRBD (**Table S1**) while Class 6 HicAs are two domain proteins consisting of a typical N-terminal dsRBD and a second domain here called the Shared Domain of 50 to 55 amino acids. Conserved proline residues (green) may serve as domain-breakers between the two domains.

### Figure S3. Sequence alignments of RelE/ParE toxins with and without the Shared Domain.

(A) Alignment of RelE/ParE superfamily of toxins with the typical N-terminal RNase I domain and a Shared C-terminal Domain (70 to 75 aa).

(B) Alignment of typical mono-domain RelE/ParE toxins and two-domain RelE/ParE toxins with a Shared C-terminal Domain.

**Figure S4. Sequence alignments of the Shared Domains of Class 6 HicAs and RelE/ParE.**

(A) Alignment of the Shared Domains of Class 6 HicAs.

(B) Alignment of Shared domains of RelE/ParE family toxins.

(C) Alignment of the two classes of Shared Domains.

**Figure S5. Comparison of Quaternary Structure Models of RelB<sub>2</sub>RelE<sub>2</sub> Complexes.**

(A) Experimental RelB<sub>2</sub>E<sub>2</sub> tetramer model of canonical RelE (CAA26251.1) and RelB (CAA26250.1) of *E. coli* K-12 (3).

(B) RelB<sub>2</sub>E<sub>2</sub> tetramer model in which RelE has a Shared Domain (WP\_141355914.1) and RelB (WP\_174787664.1) of *Glutamicibacter nicotianae* (an Actinomycete) generated by MultiFOLD (pLLDT = 0.67). The Shared Domains are marked with green circles. Note that RelB in (A) dimerizes via a HTH domain while RelB in (B) dimerizes via a Phd/YefM Domain.

**Figure S6. Tertiary and Quaternary Structure Models of Class 7 HicA, HicB and HicAB.**

(A) Predicted model of Class 7 HicA (WP\_001674386.1; 65 aa) revealing the canonical dsRBD  $\alpha$ - $\beta$ - $\beta$ - $\alpha$  fold of HicA.

(B) Predicted Model of Class 7 HicB (WP\_000065196.1; 217 aa) revealing its two-domain structure.

(C) Dimer structure of Class 7 HicA and HicB modelled by MultiFold. Dimer pLDDT: 0.918; Dimer pTM: 0.750; Assembly quality: 0.9098; Interface quality: 0.9058.

**Figure S7. Secondary and Tertiary Structures of Class 8 HicA and HicB.**

(A) Tertiary structure of Class 8 HicA (GenBank ID: WP\_004069339.1; 95 aa) modelled by AF2.

(B) Tertiary structure of Class 8 HicB (GenBank ID: WP\_004069337.1; 342 aa) modelled by AF2.

See the text and **Table S1** for further details.

(C) Sequence alignment and secondary structure prediction of Class 8 HicA sequences. The prediction was generated by analysis of an alignment of Class 8 HicA sequences in the JPRED module of Jalview.  $\alpha$ -helices are colored magenta and  $\beta$ -sheets cyan.

**Figure S8. Sequence Alignments and Secondary Structures of Class 8 HicB sequences.**

Sequence alignment and secondary structure prediction of Class 8 HicB sequences. The prediction was generated by analysis of an alignment of Class 8 HicB sequences in the JPRED module of Jalview.  $\alpha$ -helices are colored red and  $\beta$ -sheets green.

**Figure S9. Tertiary Structure Models of Class 10 HicAs.**

The tertiary structures of 21 Class 10 HicAs were modelled by AlphaFold2. They all have a pLLDT score  $> 90$ . Numbers refer to the listing in **Table S1** (Sheet #19).

**Figure S10. RelE-Encoding Genes Adjacent to pVip Genes.**

(A) Comparison of the organization of genes encoding pVip and HicA, and pVip and RelE.

(B) Superposition of RelE from a pVip-encoding operon (WP\_263530310.1; cyan) and RelE-homolog YoeB of *E. coli* K-12 determined experimentally (4) (2A6S; magenta). The RMSD between 19 pruned atom pairs is 0.835 Å.

(C) Sequence alignment and secondary structure prediction of 15 RelE-homologous RNases encoded by genes juxtaposed to pVip-encoding genes and RelE of *E. coli* K-12 (bottom).

**Figure S11. Class 11 Fused HicAB Dimer Model Structures.**

(A) Predicted dimer model of Class 11 fused HicAB (KPW96986.1). The monomers dimerizes via their RHH domains that are superimposed on a plasmid-encoded CopG dimer shown in blue (5) (RMSD between 25 pruned atom pairs is 0.753Å).

(B) Predicted dimer model of fused Class 11 HicBA (WP\_243550782.1). The monomers dimerizes via their HTH domains that are superimposed on the HTH domain of HipB of *E. coli* K-12 (6) (RMSD between 35 pruned atom pairs is 1.226Å).

**Figure S12. Phylogenetic Tree of 185 Class 2 HicBAs generated by fusion in silico of the HicB and HicA proteins and 7 Class 12 naturally fused HicBAs.** The HicBA sequences were aligned with Clustal Omega and the Tree generated by the FastTree module of Geneious Prime using Ultrafast bootstrapping. Blue: Class 2 HicBA sequences; Red: Class 12 HicBA sequences

**Figure S13. Secondary and Tertiary Structures of a Fused Class 13 HicBA Toxin – Antitoxin.**

(A) Secondary structure of Class 13 HicBA (WP\_067334119.1). Helices are in magenta, sheets in cyan and coil in light grey.

(B) Tertiary structure of Class 13 HicBA (WP\_067334119.1). Helices are in magenta, sheets in cyan and coil in light grey.

**Figure S14. Predicted Secondary and Tertiary Structures of a Fused SMC-HipA Protein.**

(A) Primary and secondary structures of a Class 14 SMC-HicA two-domain protein

(WP\_223300692.1). Helices are in magenta, sheets in cyan.

(B) Tertiary structure of Class 14 SMC-HicA protein (WP\_223300692.1). The coloring palette was from AlphaFold2 where blue is high and yellow low quality of the prediction. In particular, loops and parts of the coiled-coil domains were predicted with low quality whereas the C-terminal HicA domain and a globular domain were predicted with high quality.

(C) Enlargement of the C-terminal HicA-domain of the structure shown in (B).

**Figure S15. Defense Islands Encoding *hicAB* and *hicBA* Genes.**

(A) Alignment of DNA sequences encoding Defense Islands of 11 *Shigella flexneri* strains encoding *hicAB* loci. The *hicA* and *hicB* genes are colored red and green, respectively, transposase genes are yellow and virulence factors magenta. The data were retrieved from TADB 3.0 and the Figure generated by Clinker & Clustermap (7) embedded in TADB3.0. (8).

(B) Defense Island of archaeon *Methanosarcina barkeri* 3 (NZ\_CP009517.1) encoding two *hicBA* (green, red), two solitary *hicB* genes (green) and a *vapBC* locus (pale blue, blue).

(C) Defense Island of *Thermodesulfobacterium hydrogeniphilum* strain DSM 14290

(NZ\_JQKW01000008) encoding three *hicBA* (green, red), three *relBE* (magenta, pink), two *vapBC* (pale blue, blue) and one *vapC* gene (blue). TPR: gene encoding a tetratricopeptide repeat protein.

Genes unrelated to TA modules are shown in grey. DUF: domain of unknown function. DUF2442 is often found in antitoxins (9).

## Supplementary Table

**Table S1:** Primary information of members of the 14 Classes of HicA-domain encoding TA modules identified in this work.

**Sheets 1 to 14:** Information of HicA and HicB of the 14 classes. Columns A to J yield the following information: (A) GenBank ID of HicA-domain protein; (B) Organism; (C) Label yielding phylum, gene length in codons, GenBank ID and Class of HicA-domain protein. These labels were used in sequence alignments and in the phylogenetic trees (**Figures 7 and S12**); (D) HicA sequence; (E) Distance between *hicA* gene and its cognate antitoxin-encoding gene in nucleotides (a minus indicates gene overlap); (F) Genetic order (GO) of each toxin – antitoxin module; (G) HicA Class; (H) Label yielding HicB antitoxin phylum, gene length, GenBank ID and Class; (I) HicB Antitoxin or pVIP sequence; (J) Domains in HicB and comments to each individual entry in the Table.

**Sheet 15:** *relBE* / *parDE* modules where the toxins contain the C-terminal Shared Domain also present in Class 6 HicA.

**Sheet 16:** Anti-phage modules encoding a pVIP and an adjacent RelE toxin.

**Sheet 17:** List of Phyla abbreviations used in Sheets 1 to 16.

## Supplementary References

1. Hattori M, Mizohata E, Manzoku M, Bessho Y, Murayama K, Terada T, Kuramitsu S, Shirouzu M, Yokoyama S. 2005. Crystal structure of the hypothetical protein TTHA1013 from *Thermus thermophilus* HB8. *Proteins* 61:1117-20.
2. Manav MC, Turnbull KJ, Jurenas D, Garcia-Pino A, Gerdes K, Brodersen DE. 2019. The *E. coli* HicB Antitoxin Contains a Structurally Stable Helix-Turn-Helix DNA Binding Domain. *Structure* 27:1675-1685 e3.
3. Bøggild A, Sofos N, Andersen KR, Feddersen A, Easter AD, Passmore LA, Brodersen DE. 2012. The crystal structure of the intact *E. coli* RelBE toxin-antitoxin complex provides the structural basis for conditional cooperativity. *Structure* 20:1641-8.
4. Kamada K, Hanaoka F. 2005. Conformational change in the catalytic site of the ribonuclease YoeB toxin by YefM antitoxin. *Mol Cell* 19:497-509.
5. Gomis-Ruth FX, Sola M, Acebo P, Parraga A, Guasch A, Eritja R, Gonzalez A, Espinosa M, del Solar G, Coll M. 1998. The structure of plasmid-encoded transcriptional repressor CopG unliganded and bound to its operator. *EMBO J* 17:7404-15.
6. Schumacher MA, Balani P, Min J, Chinnam NB, Hansen S, Vulic M, Lewis K, Brennan RG. 2015. HipBA-promoter structures reveal the basis of heritable multidrug tolerance. *Nature* 524:59-64.
7. Gilchrist CLM, Chooi YH. 2021. clinker & clustermap.js: automatic generation of gene cluster comparison figures. *Bioinformatics* 37:2473-2475.
8. Guan J, Chen Y, Goh YX, Wang M, Tai C, Deng Z, Song J, Ou HY. 2023. TADB 3.0: an updated database of bacterial toxin-antitoxin loci and associated mobile genetic elements. *Nucleic Acids Res* doi:10.1093/nar/gkad962.
9. Makarova KS, Wolf YI, Koonin EV. 2009. Comprehensive comparative-genomic analysis of type 2 toxin-antitoxin systems and related mobile stress response systems in prokaryotes. *Biol Direct* 4:19.



Figure S1

A

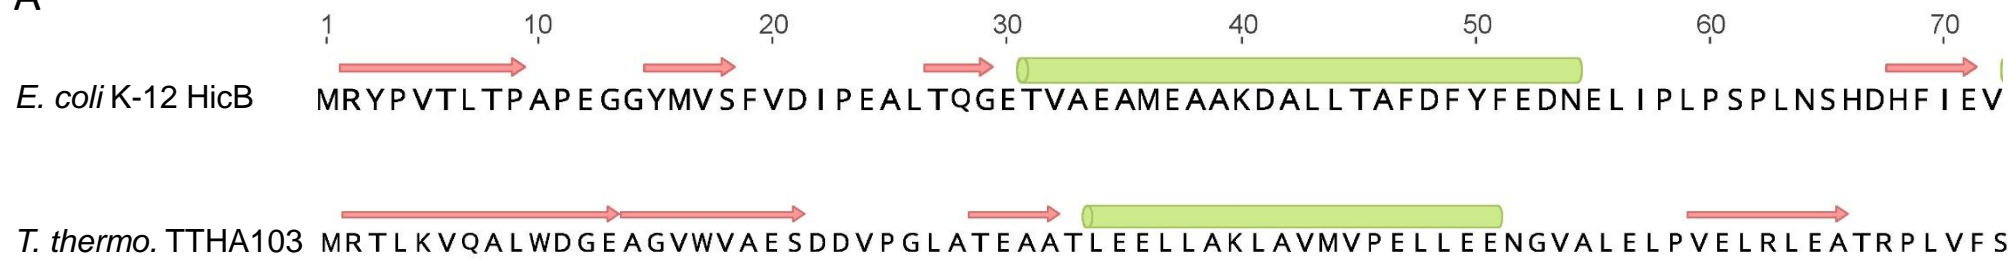

B

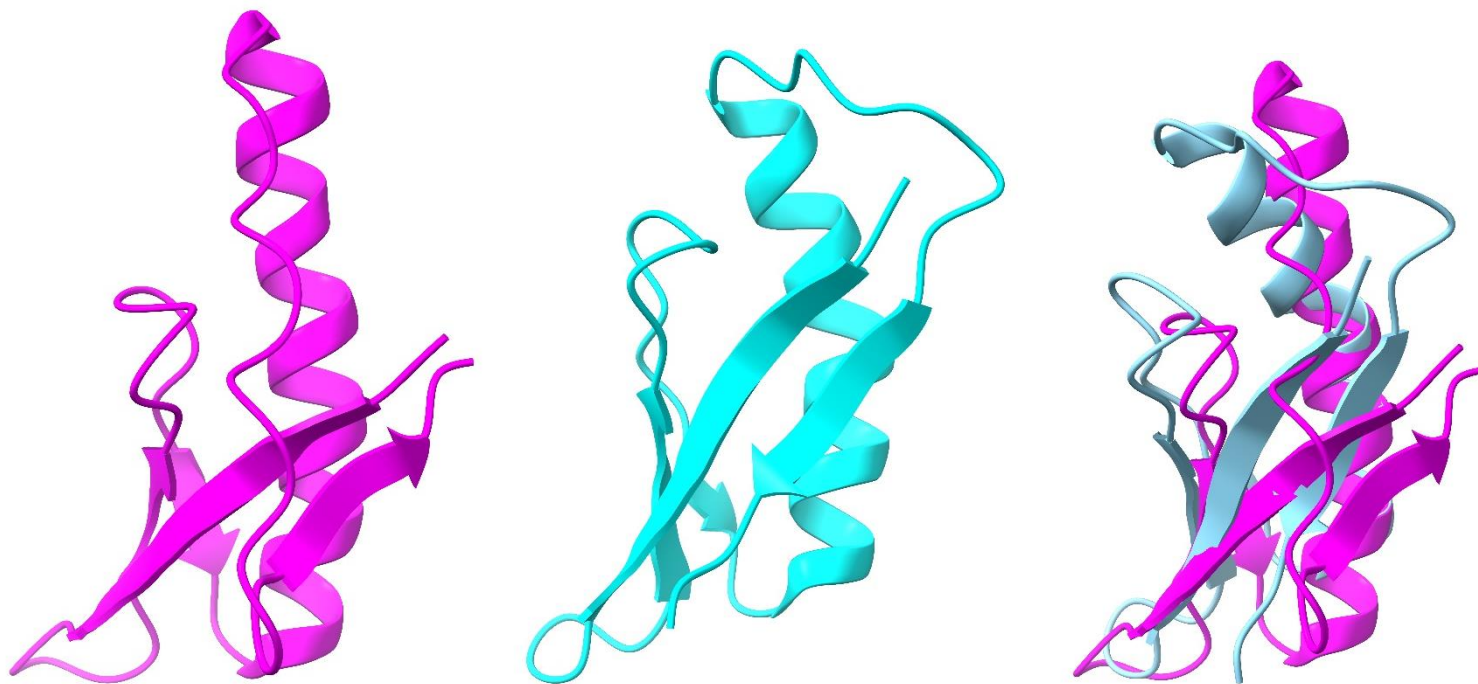

Figure S2

A: Class 6 HicAs

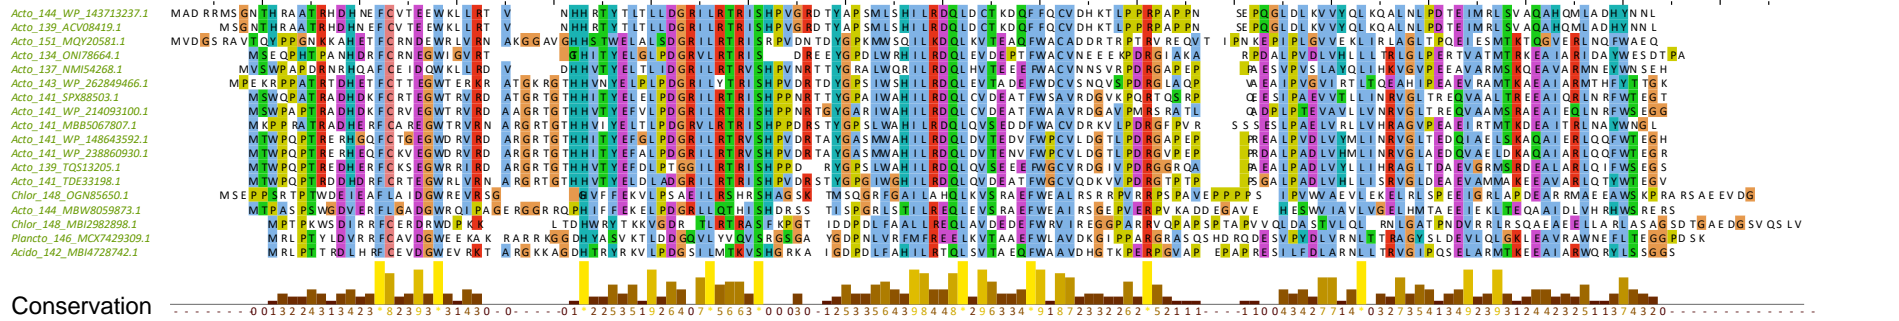

B: Class 5 & 6 HicAs

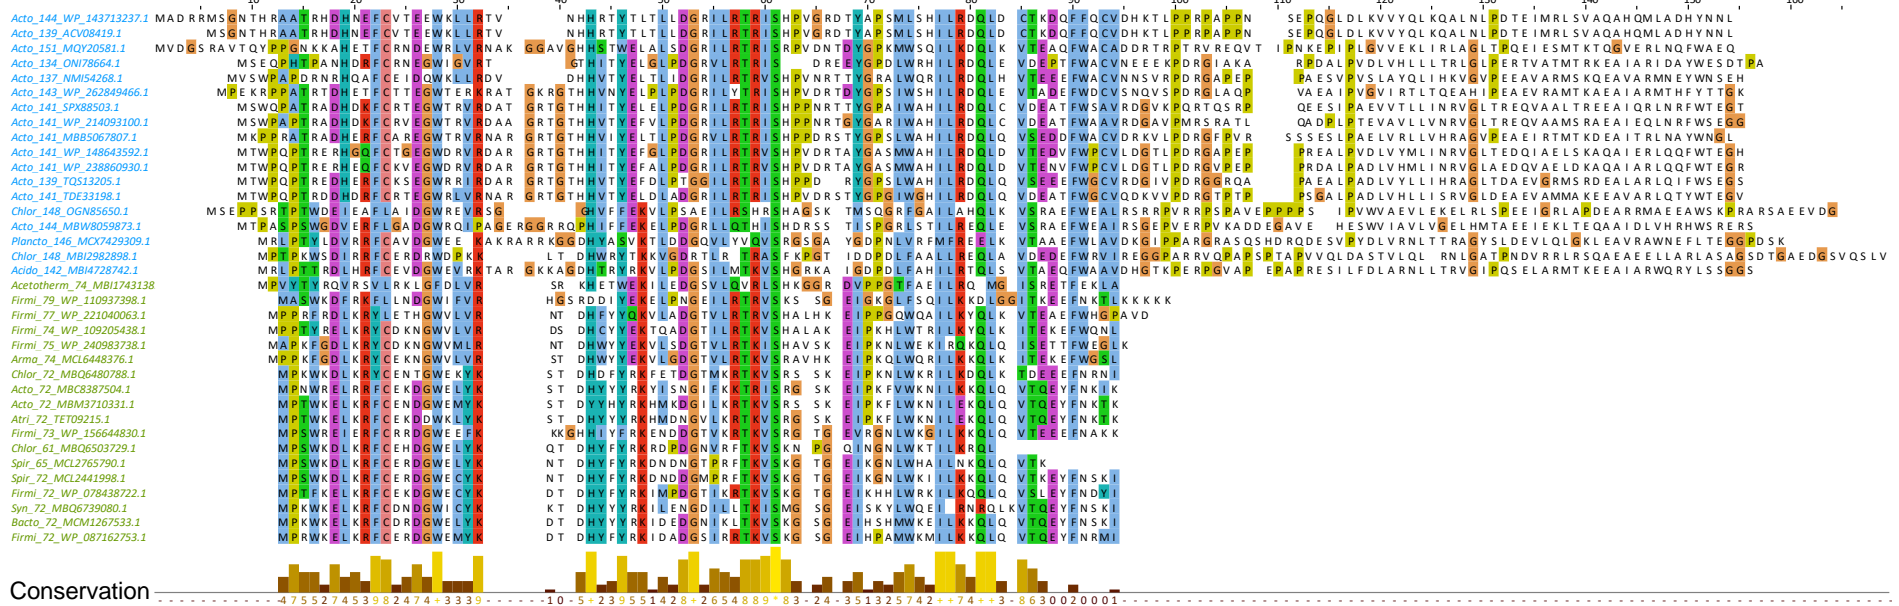

Figure S3

A: RelE/ParE with the Shared Domain

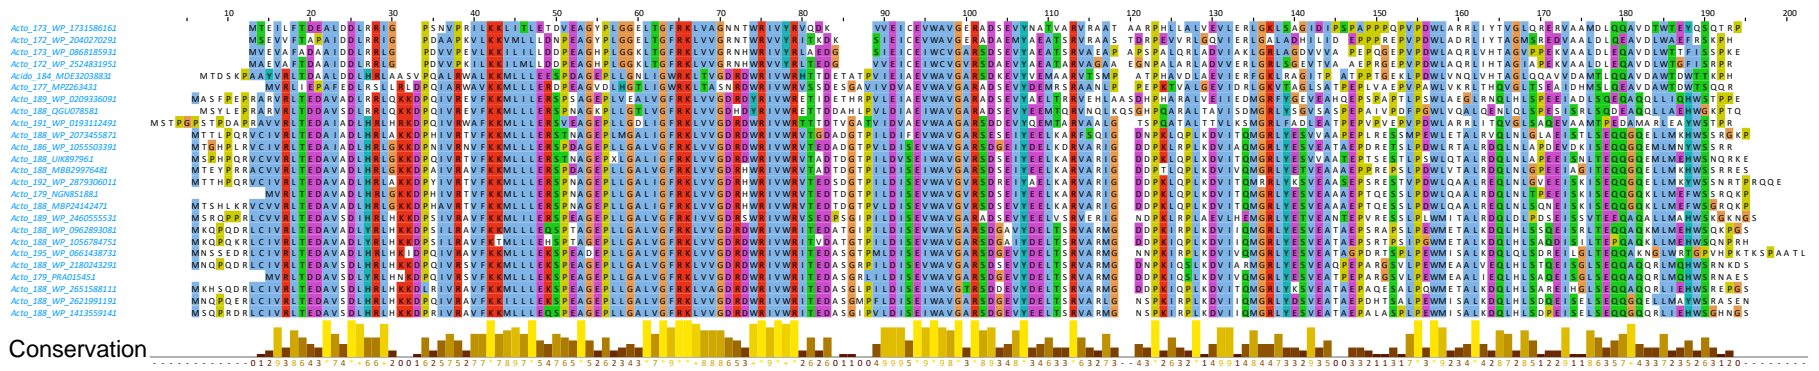

B: RelE/ParE with and without the Shared Domain

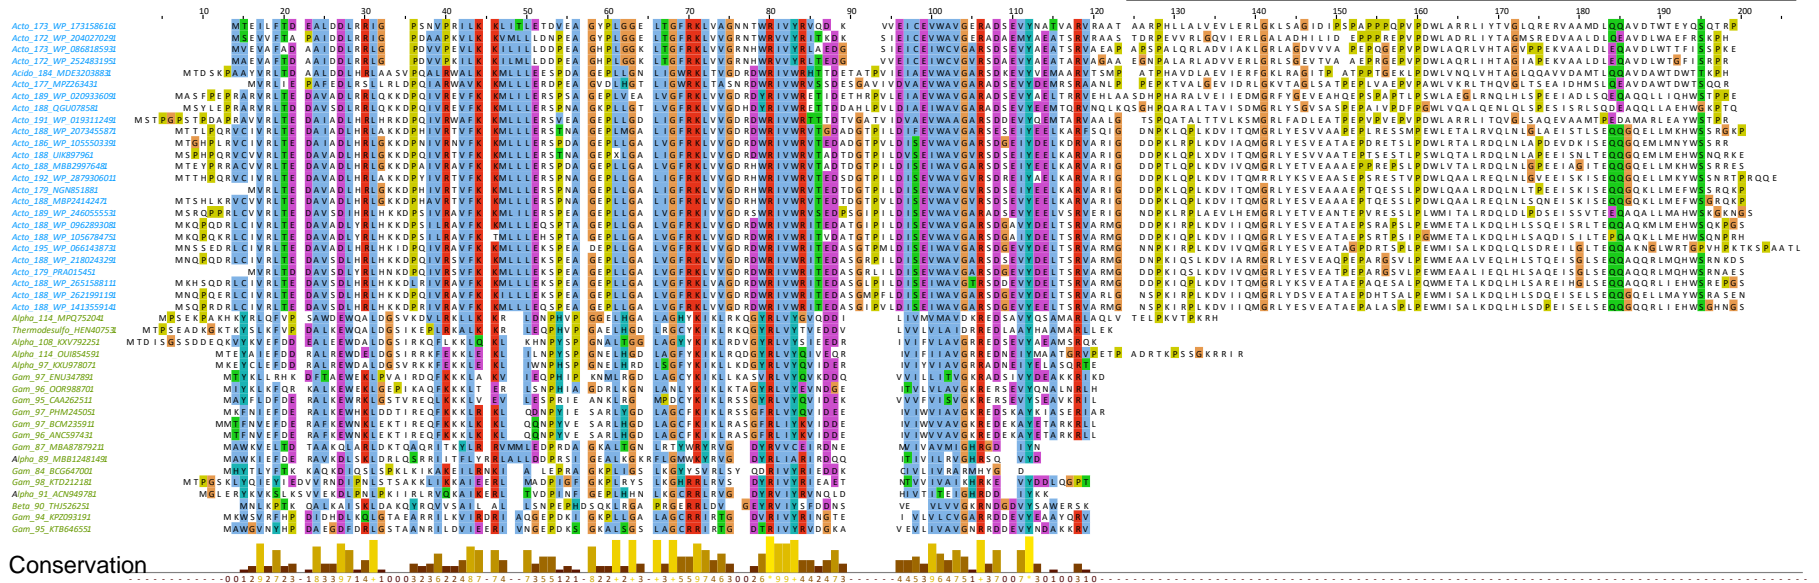

Shared Domain

Shared Domain

# Figure S4

## A: HicA Shared Domain

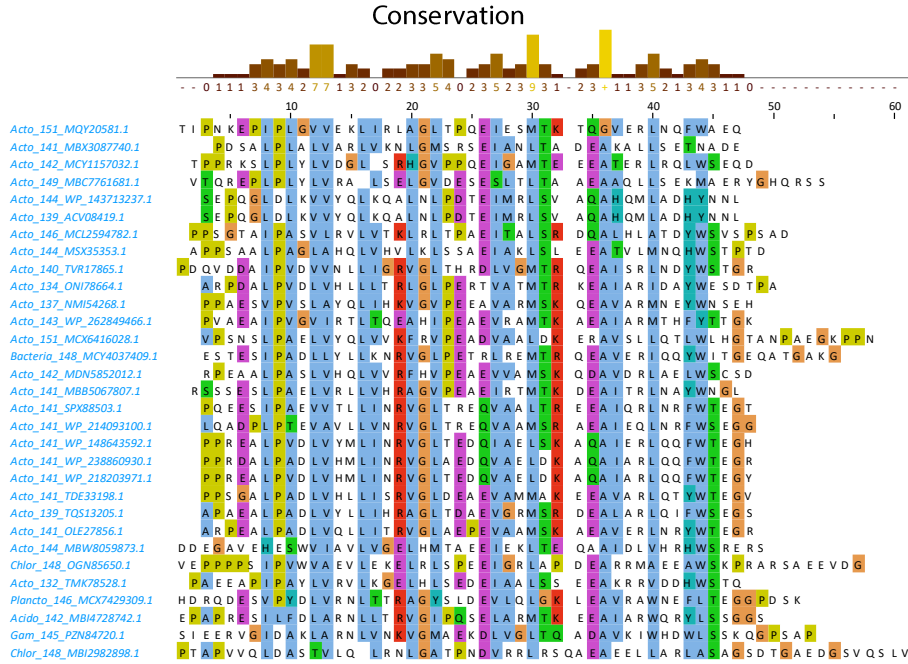

## B: RelE/ParE Shared Domain

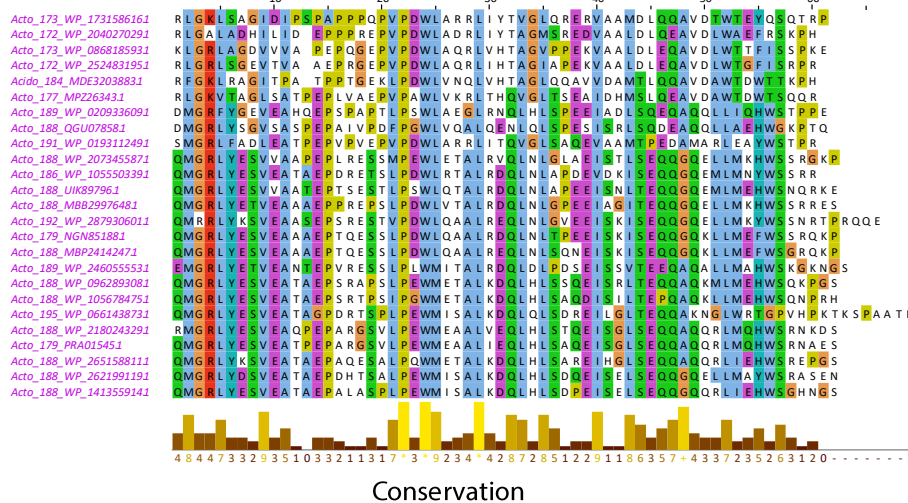

## C: Hic A & RelE/ParE Shared Domain

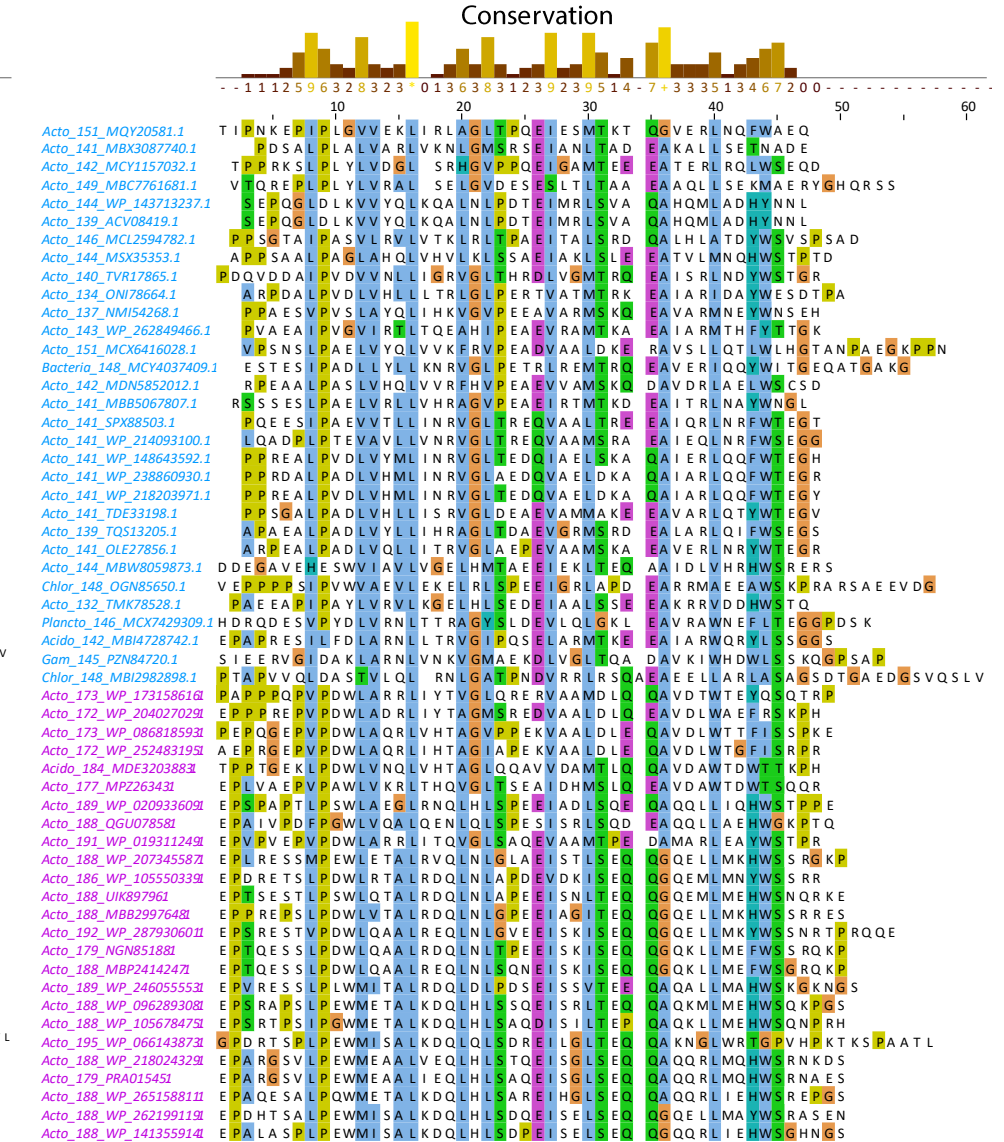



Figure S5

A

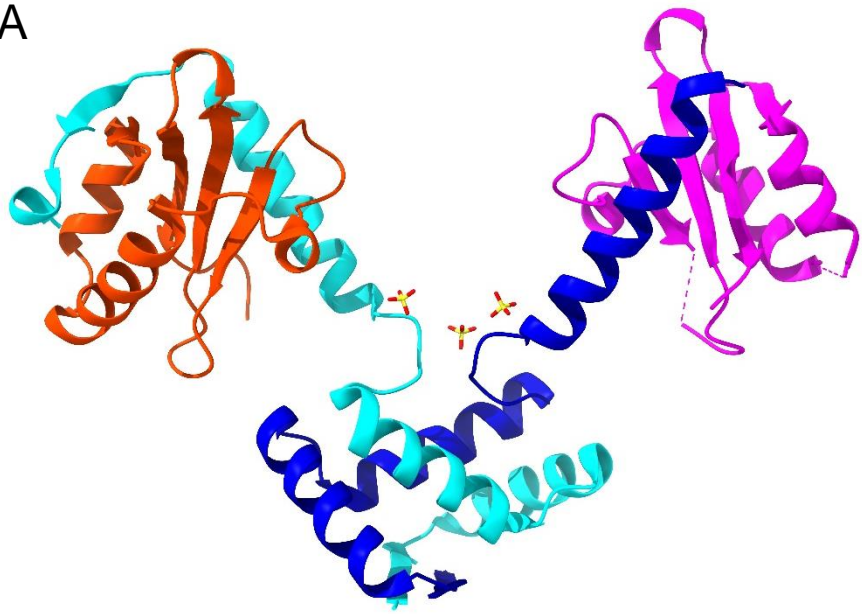

B

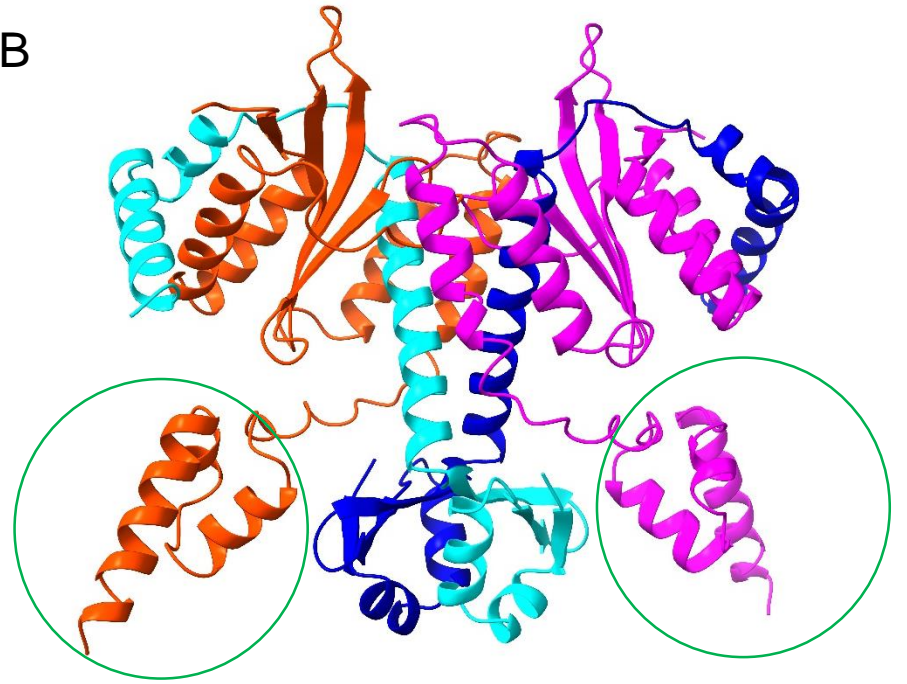

Figure S6

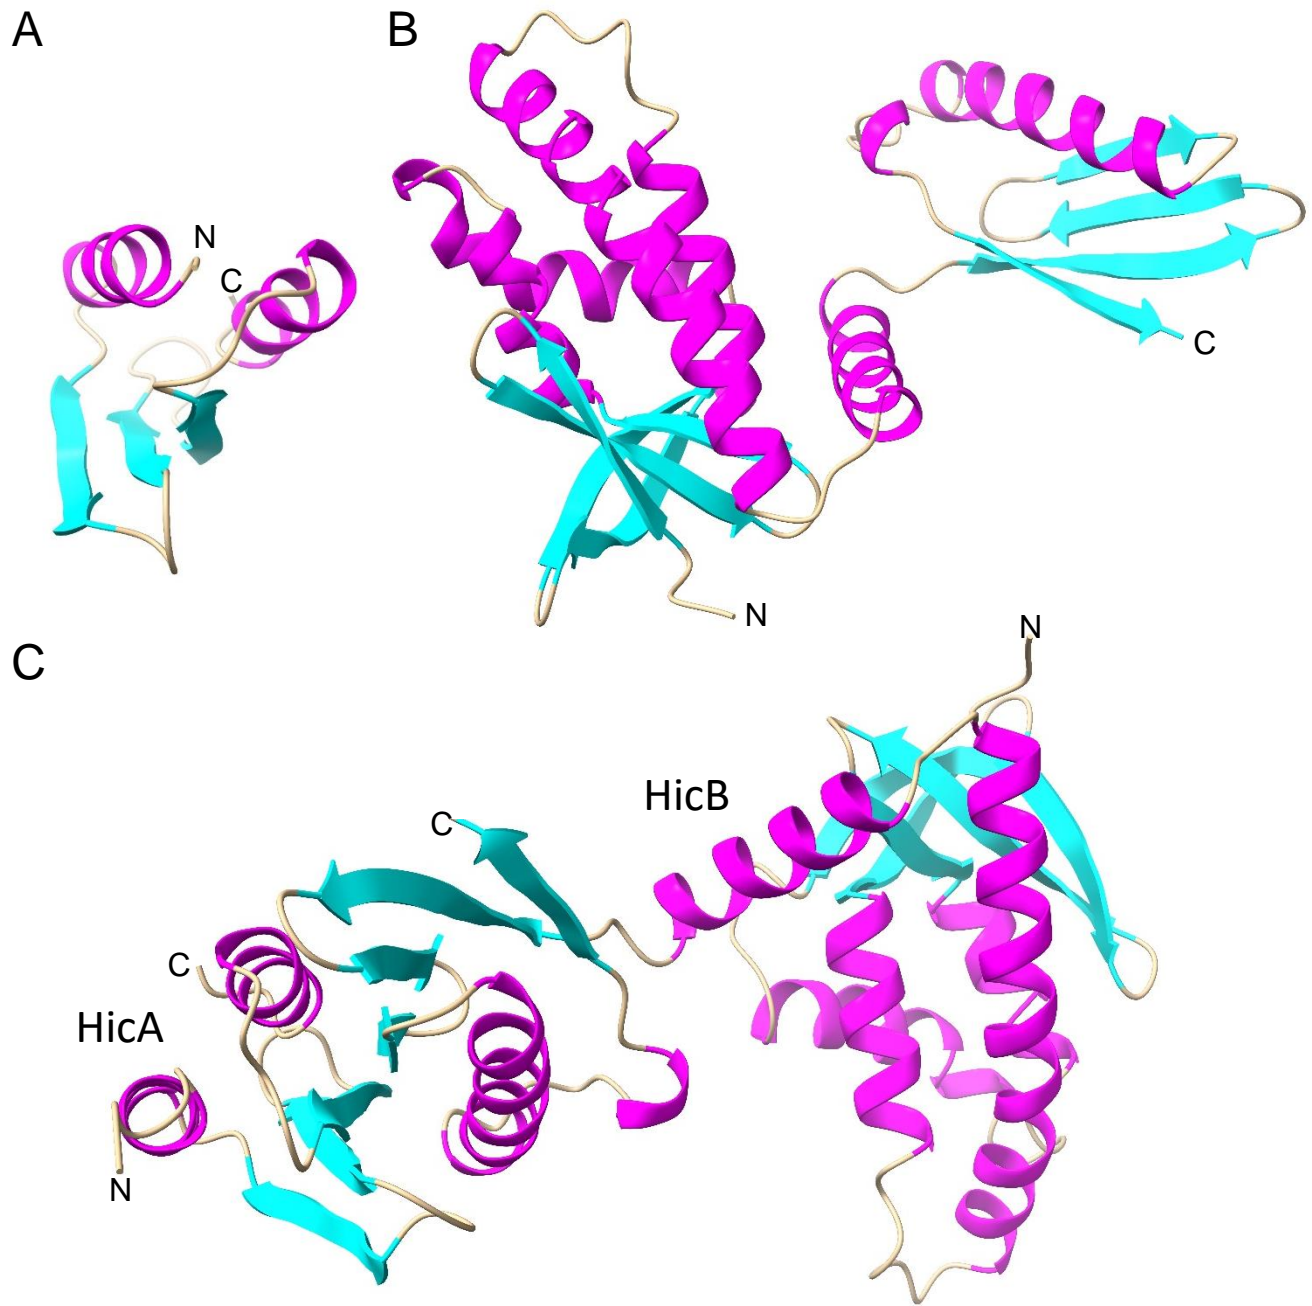

Figure S7

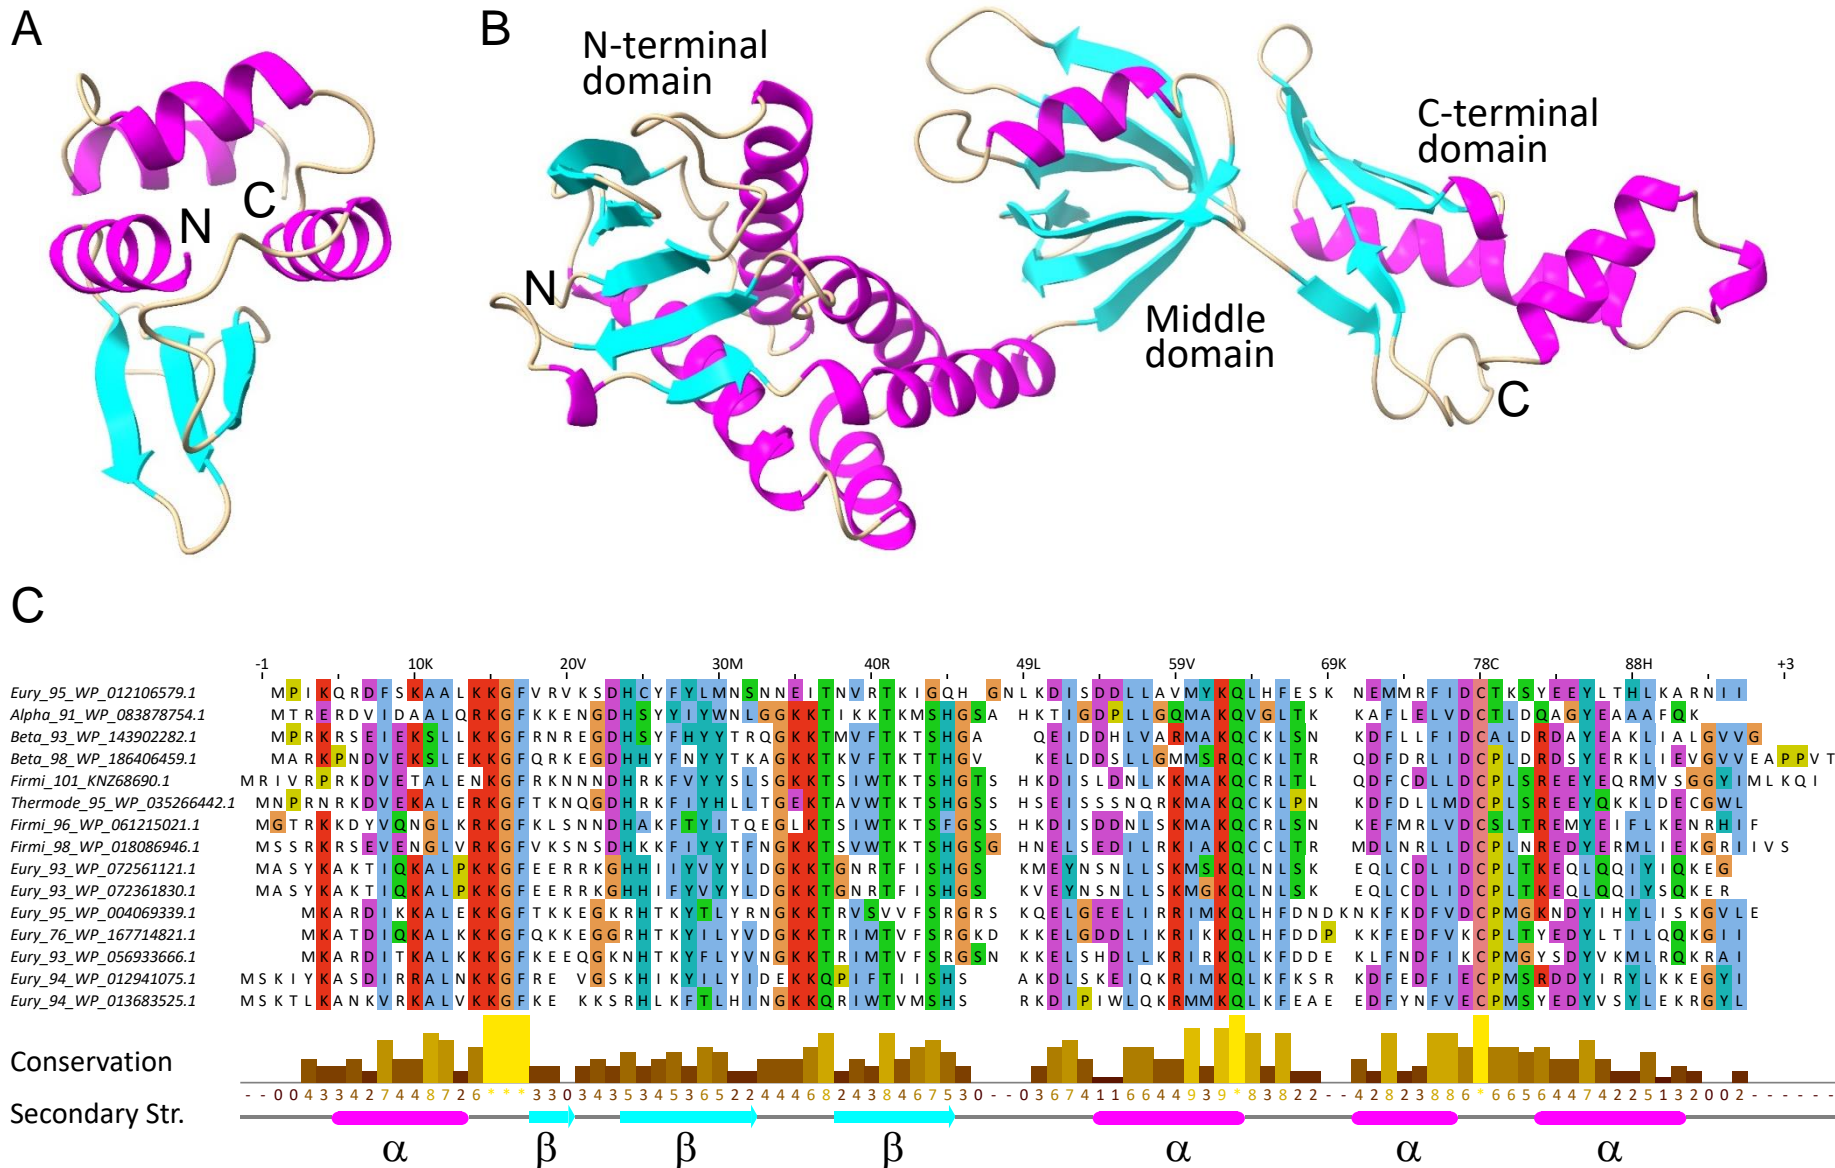

# Figure S8

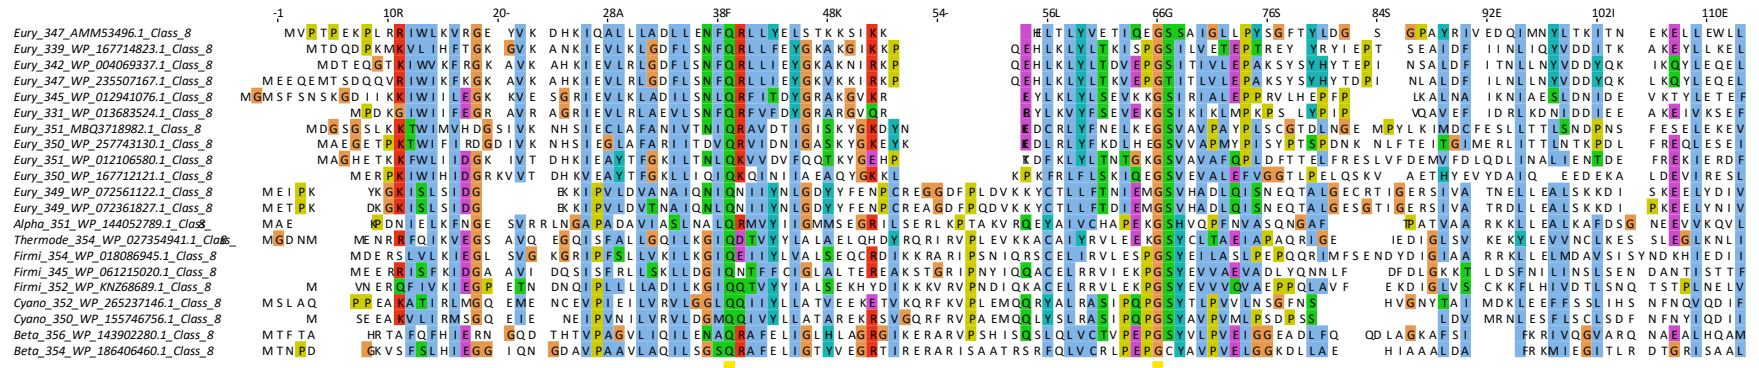

## Conservation Secondary Str.

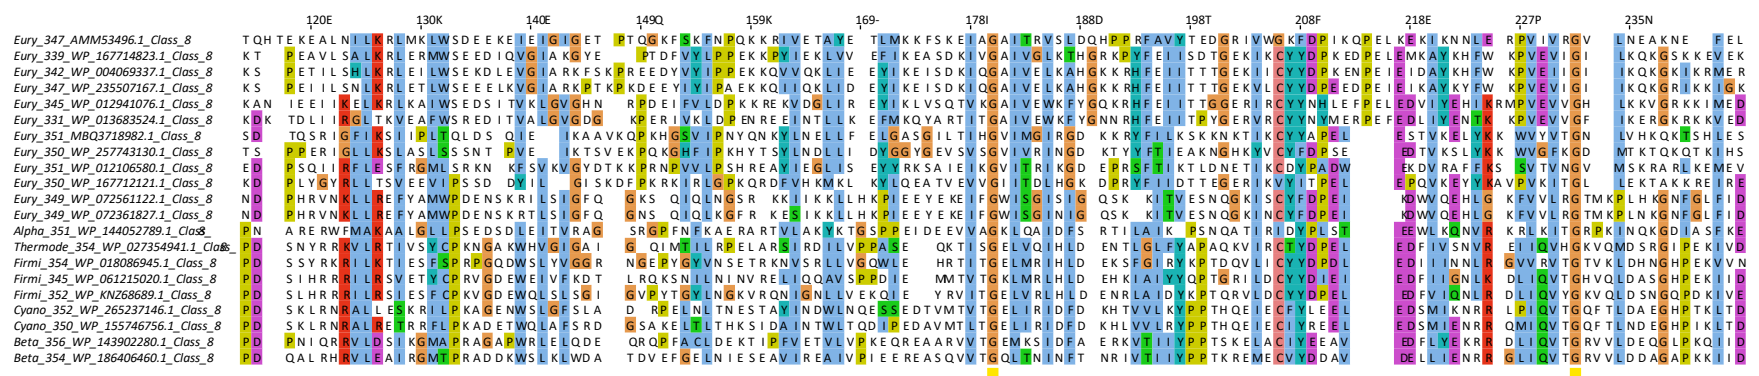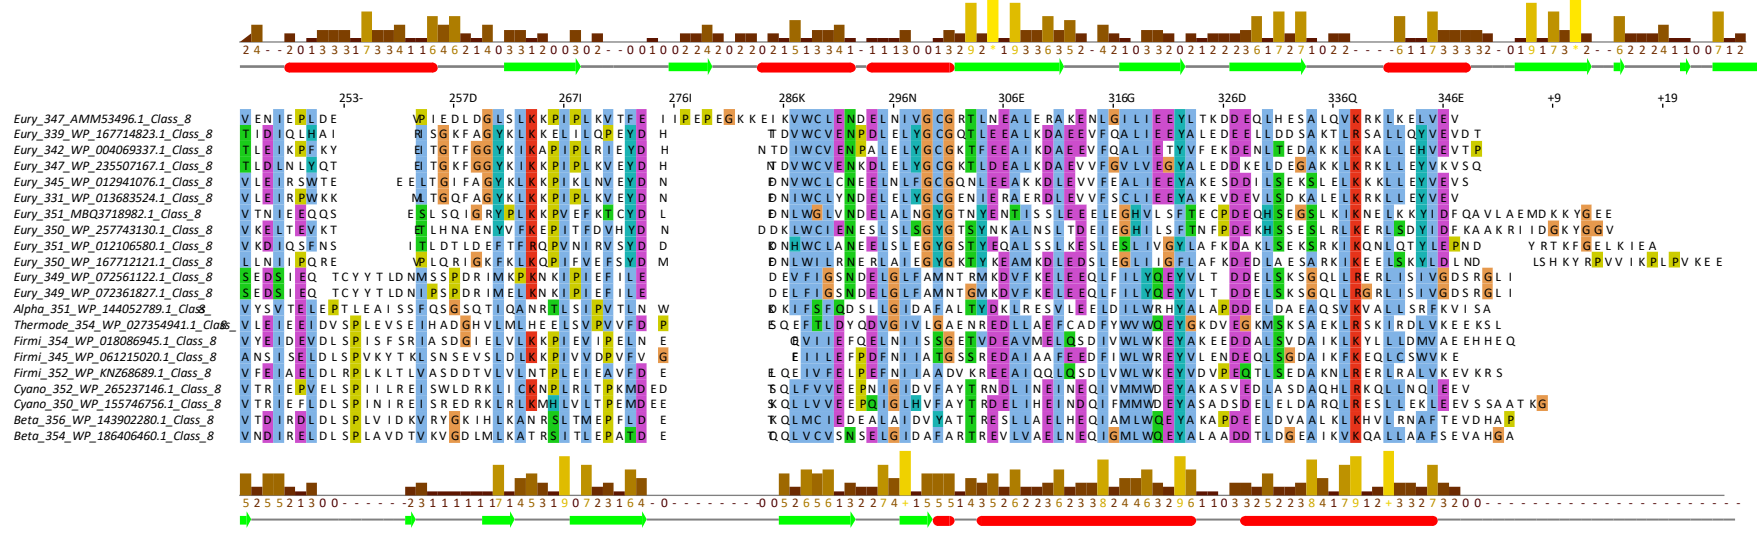



Figure S9

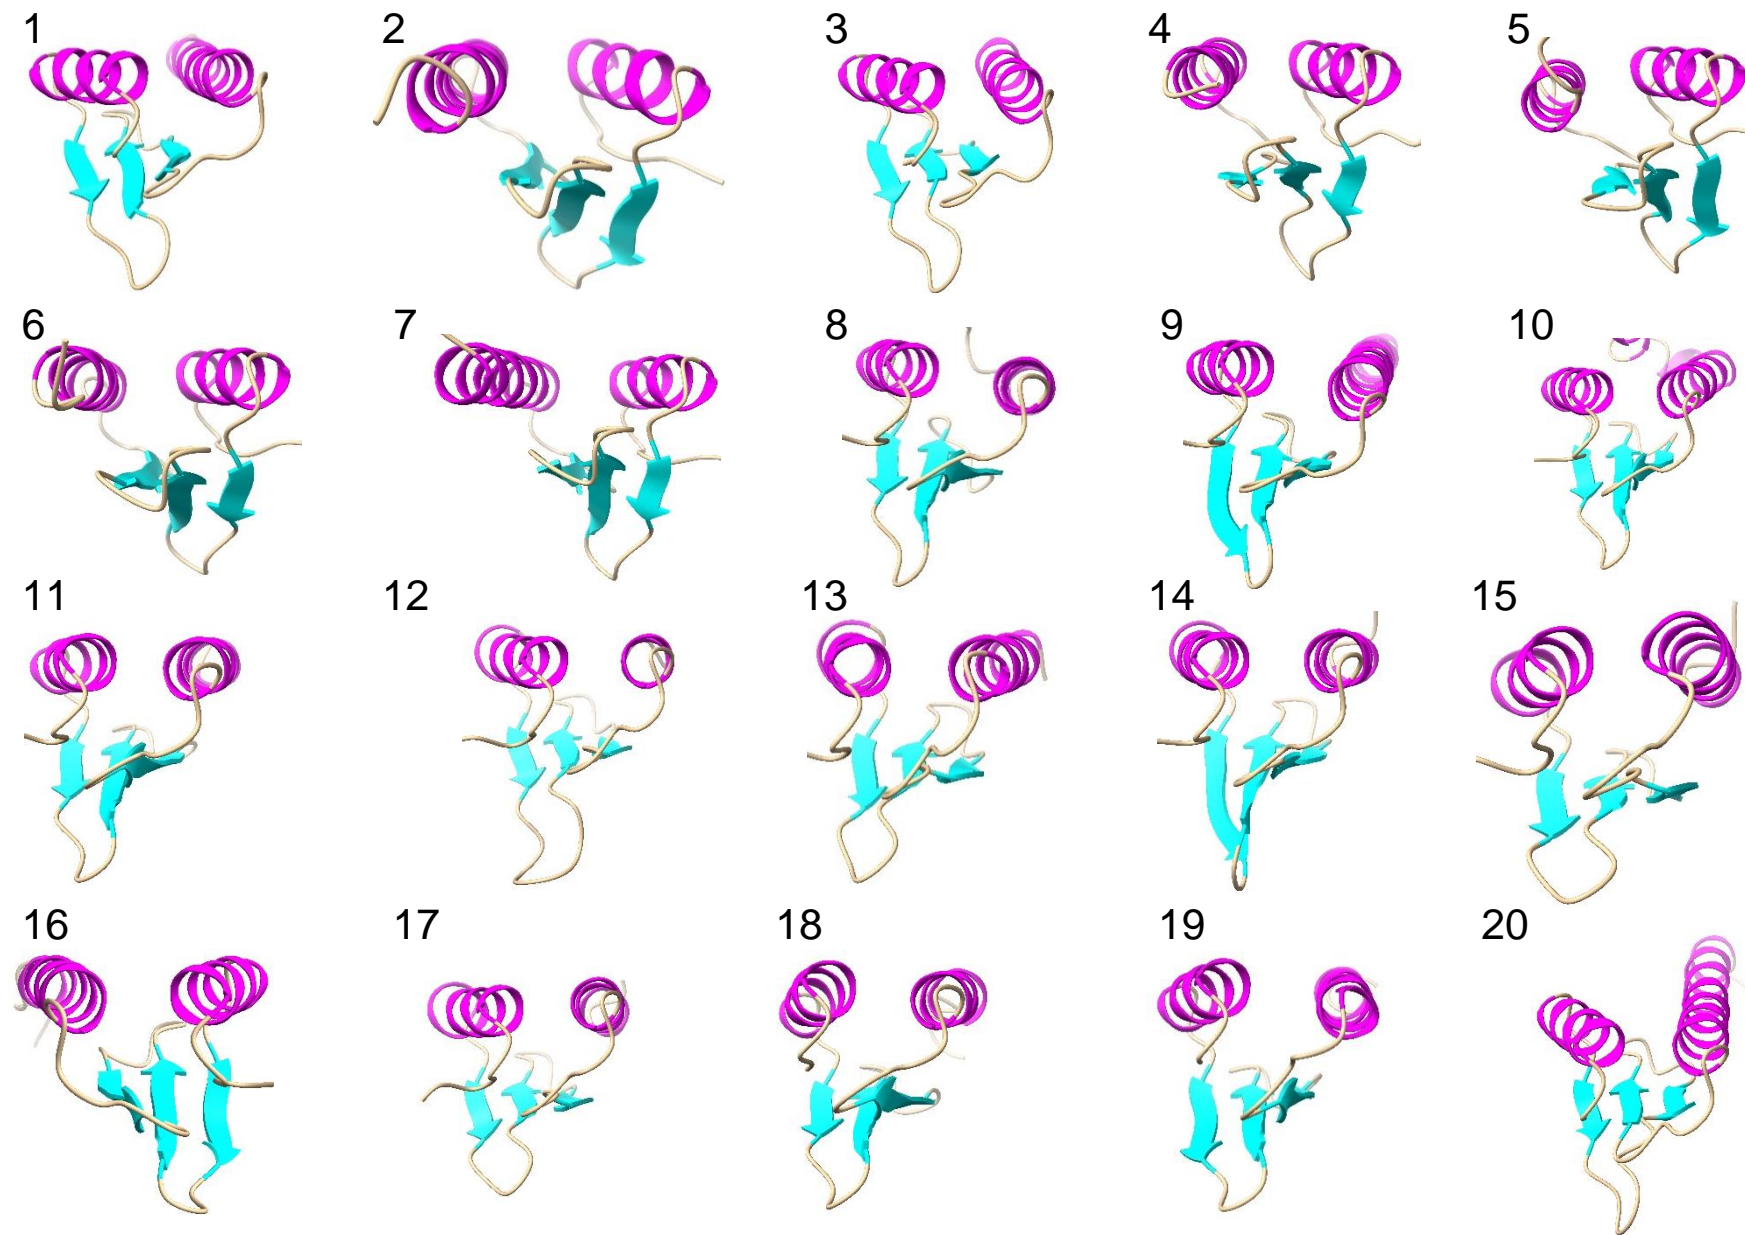

Figure S10

A

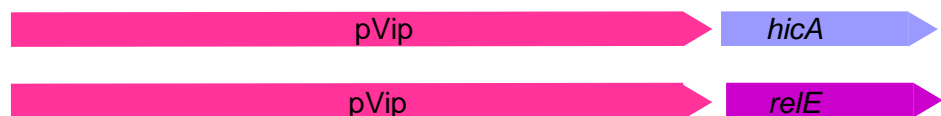

B

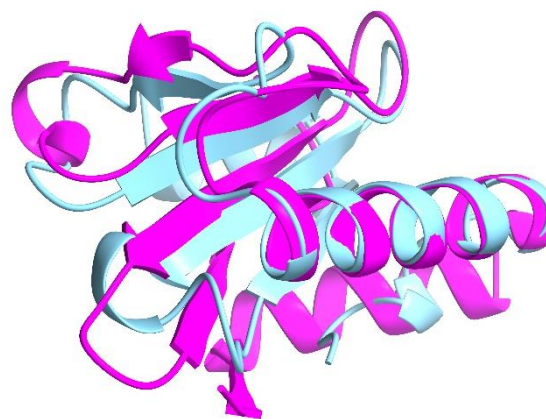

C

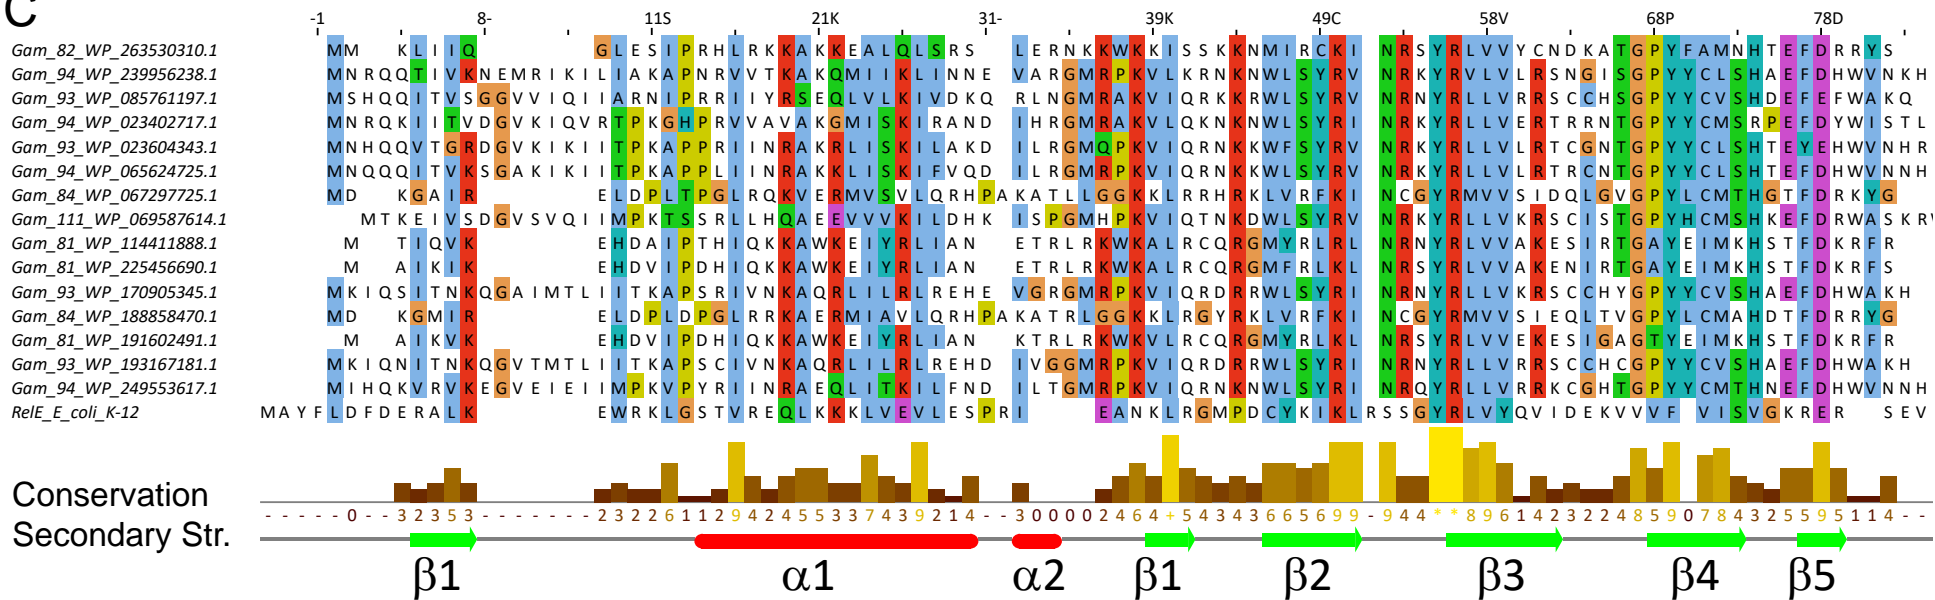

Figure S11

A

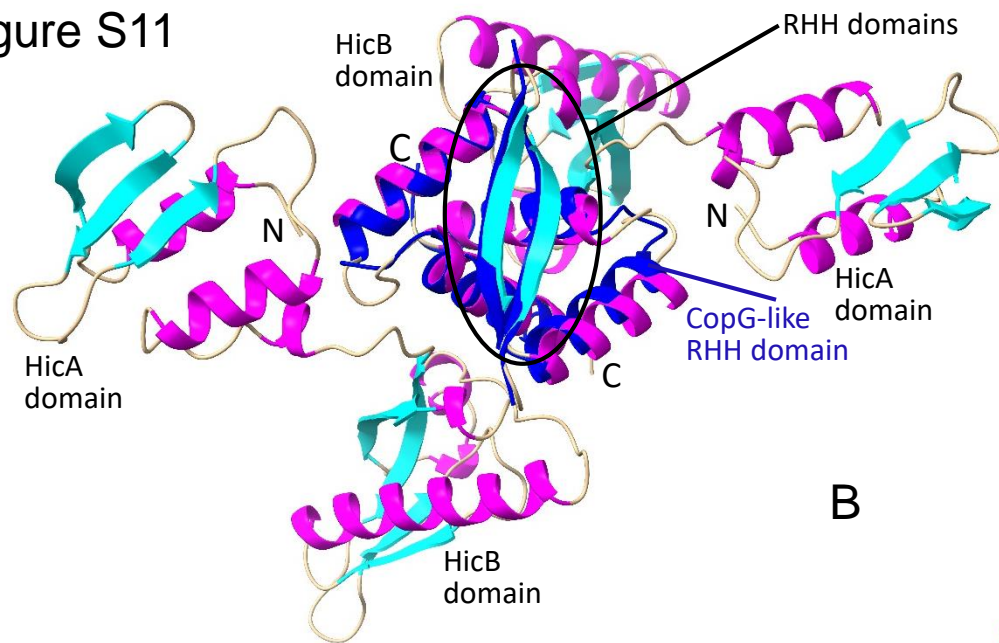

B

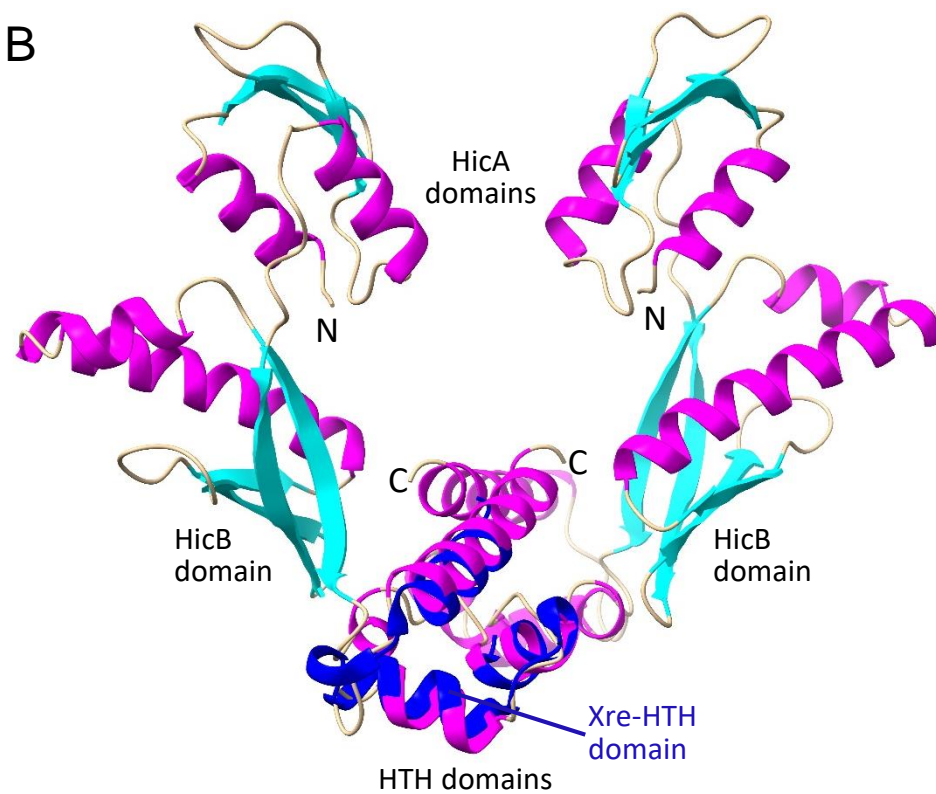

Figure S12

Non-random Clustering of Class 12 HicBAs

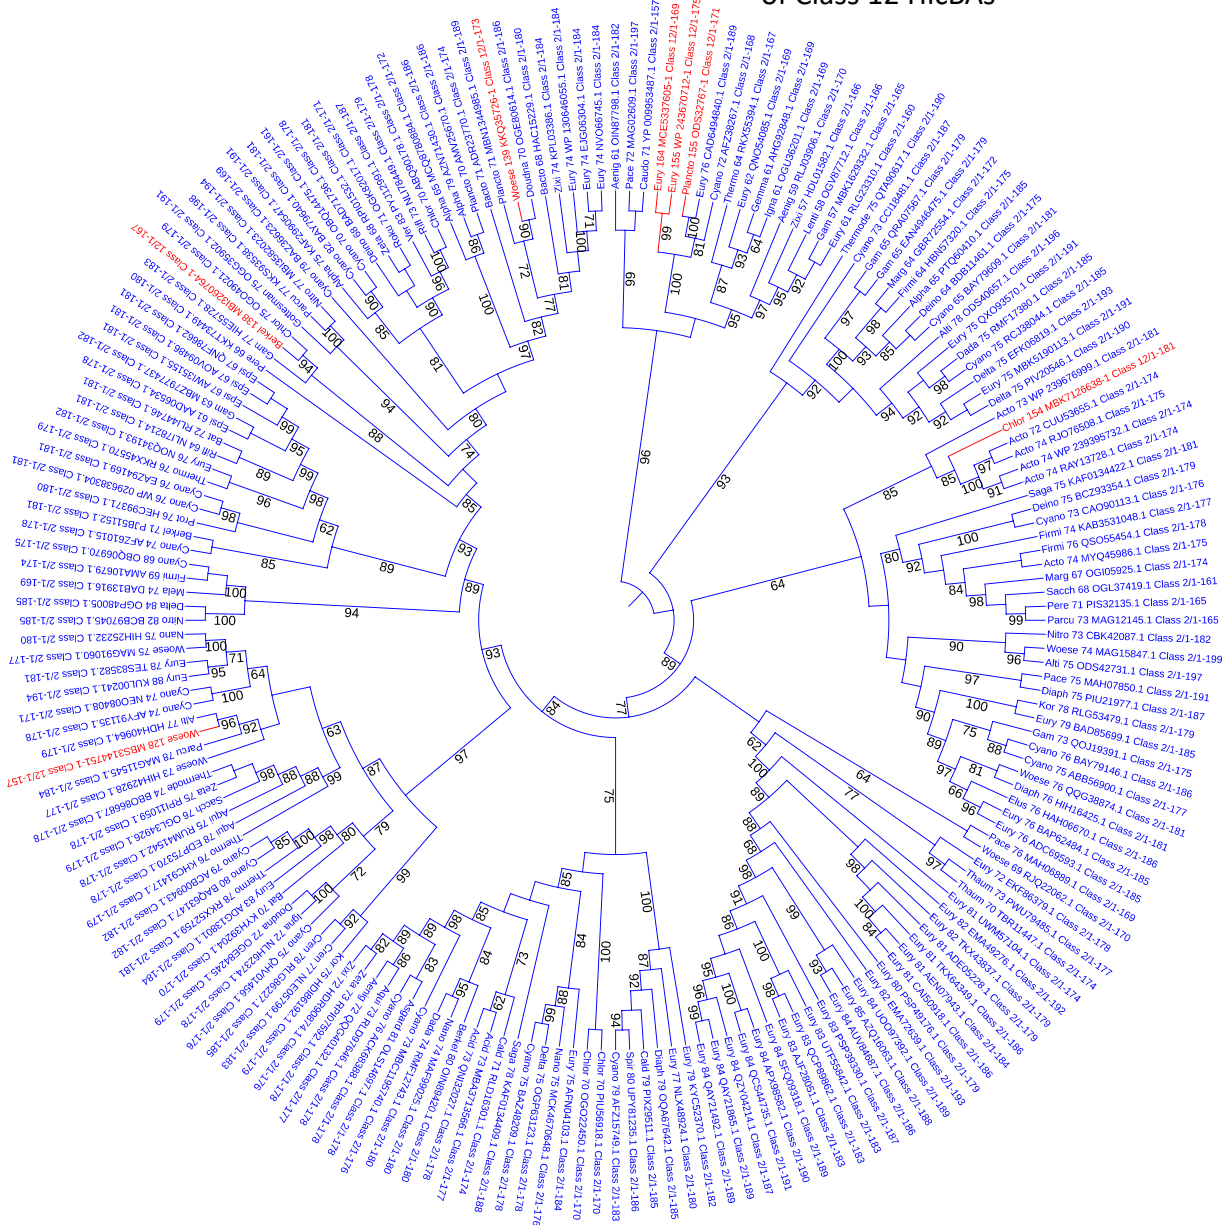



Figure S13

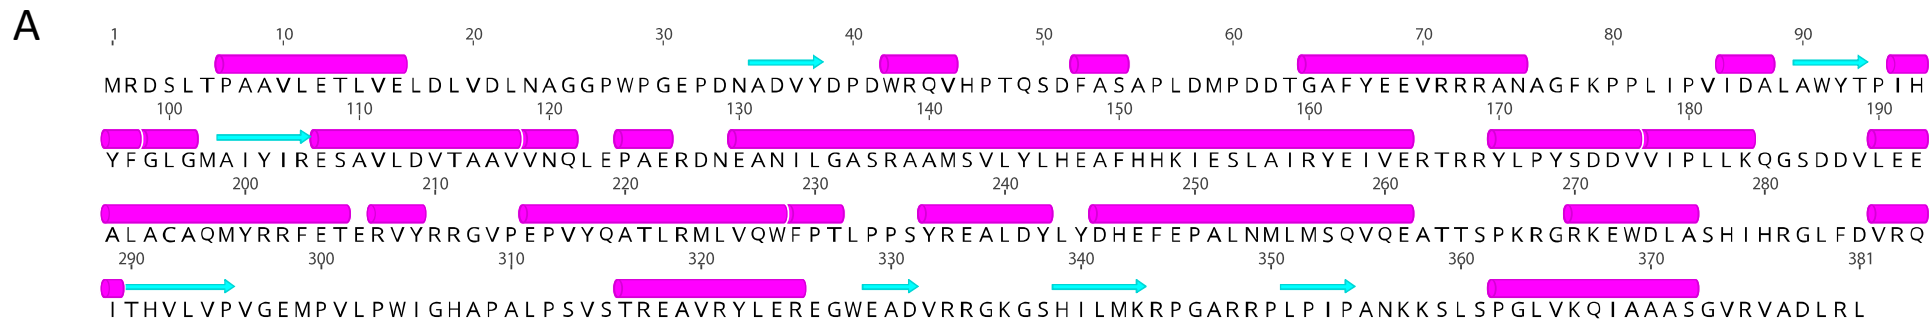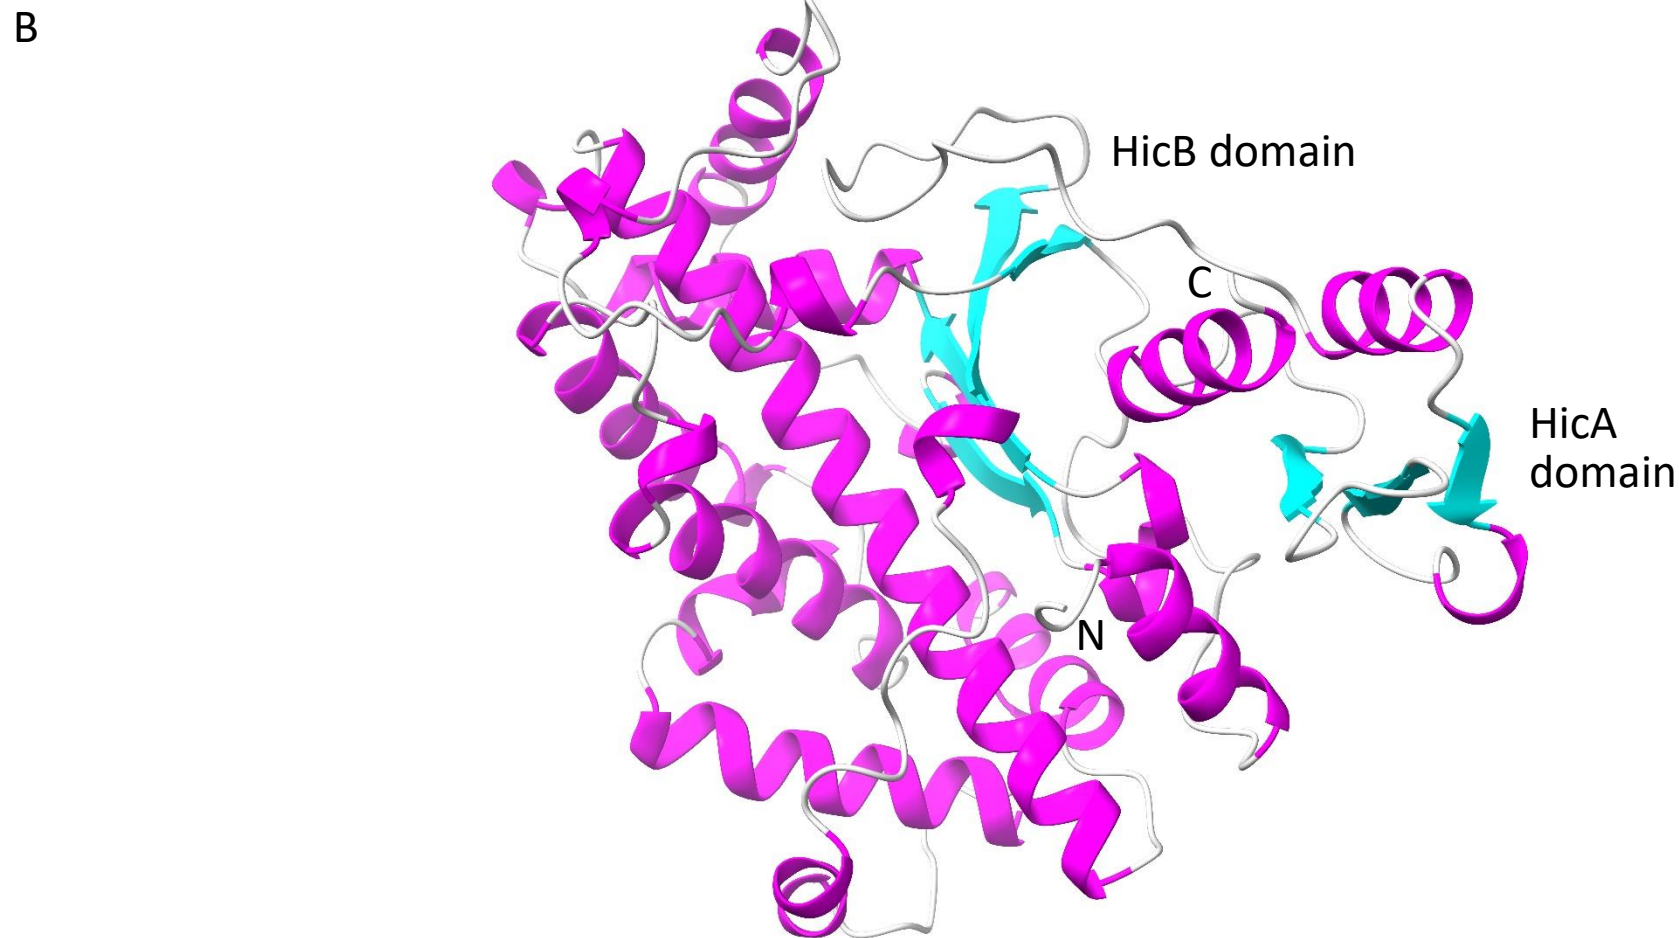

Figure S14

A

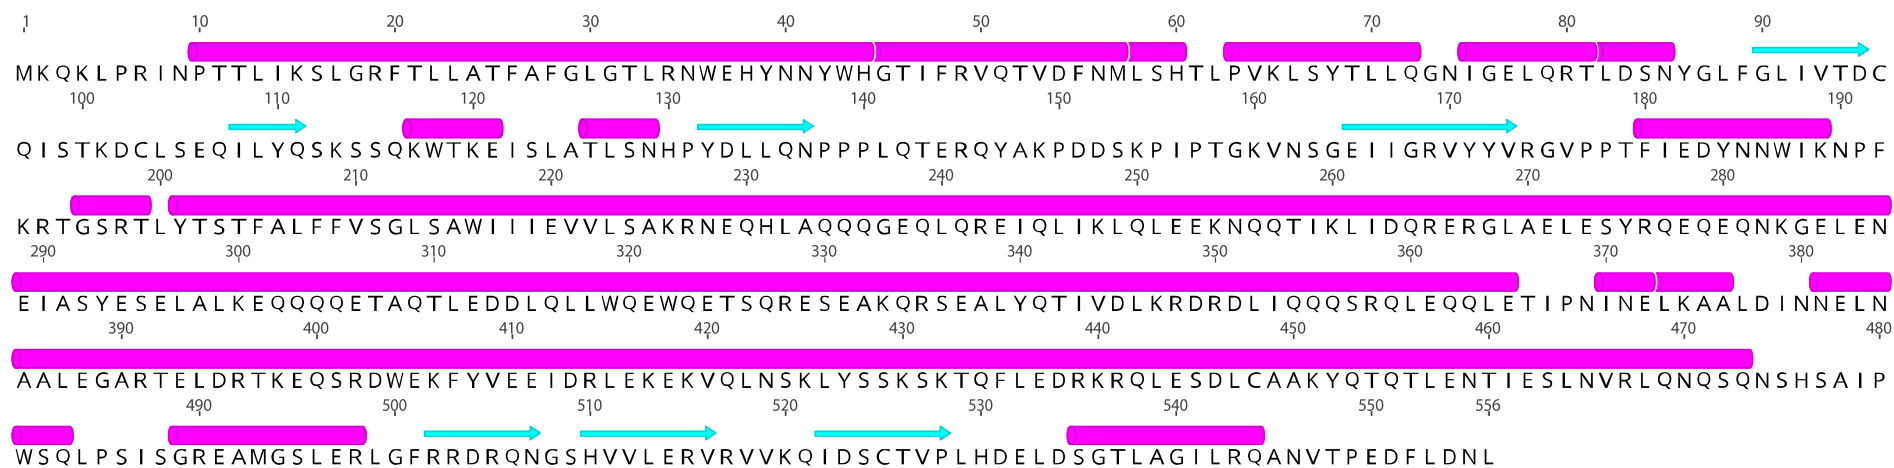

B

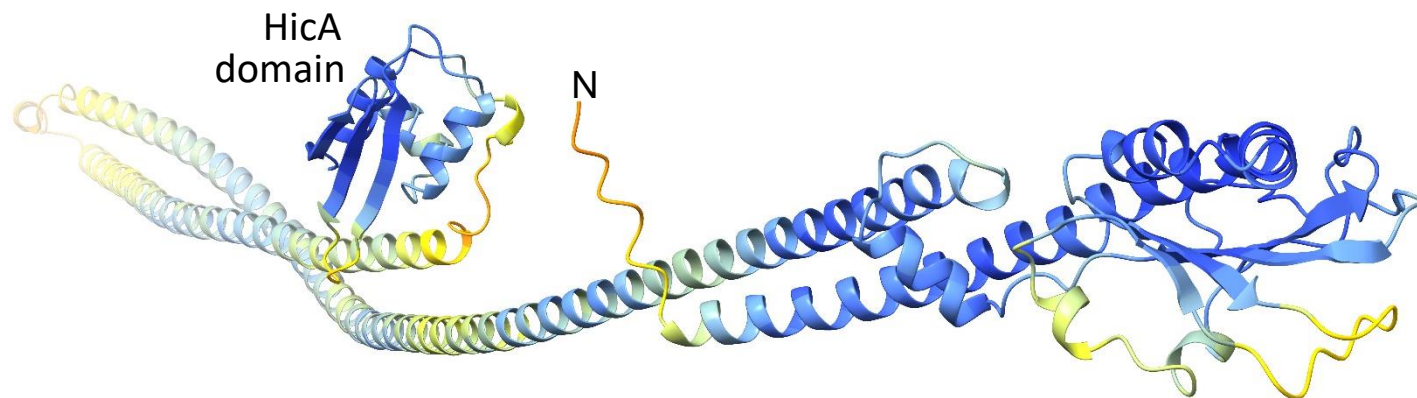

C

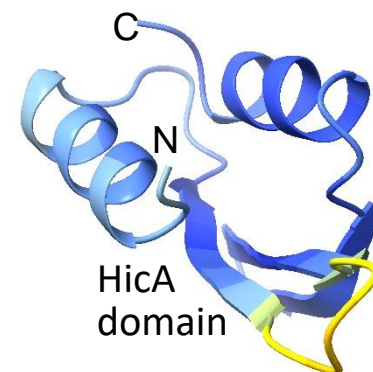

Figure S15

A

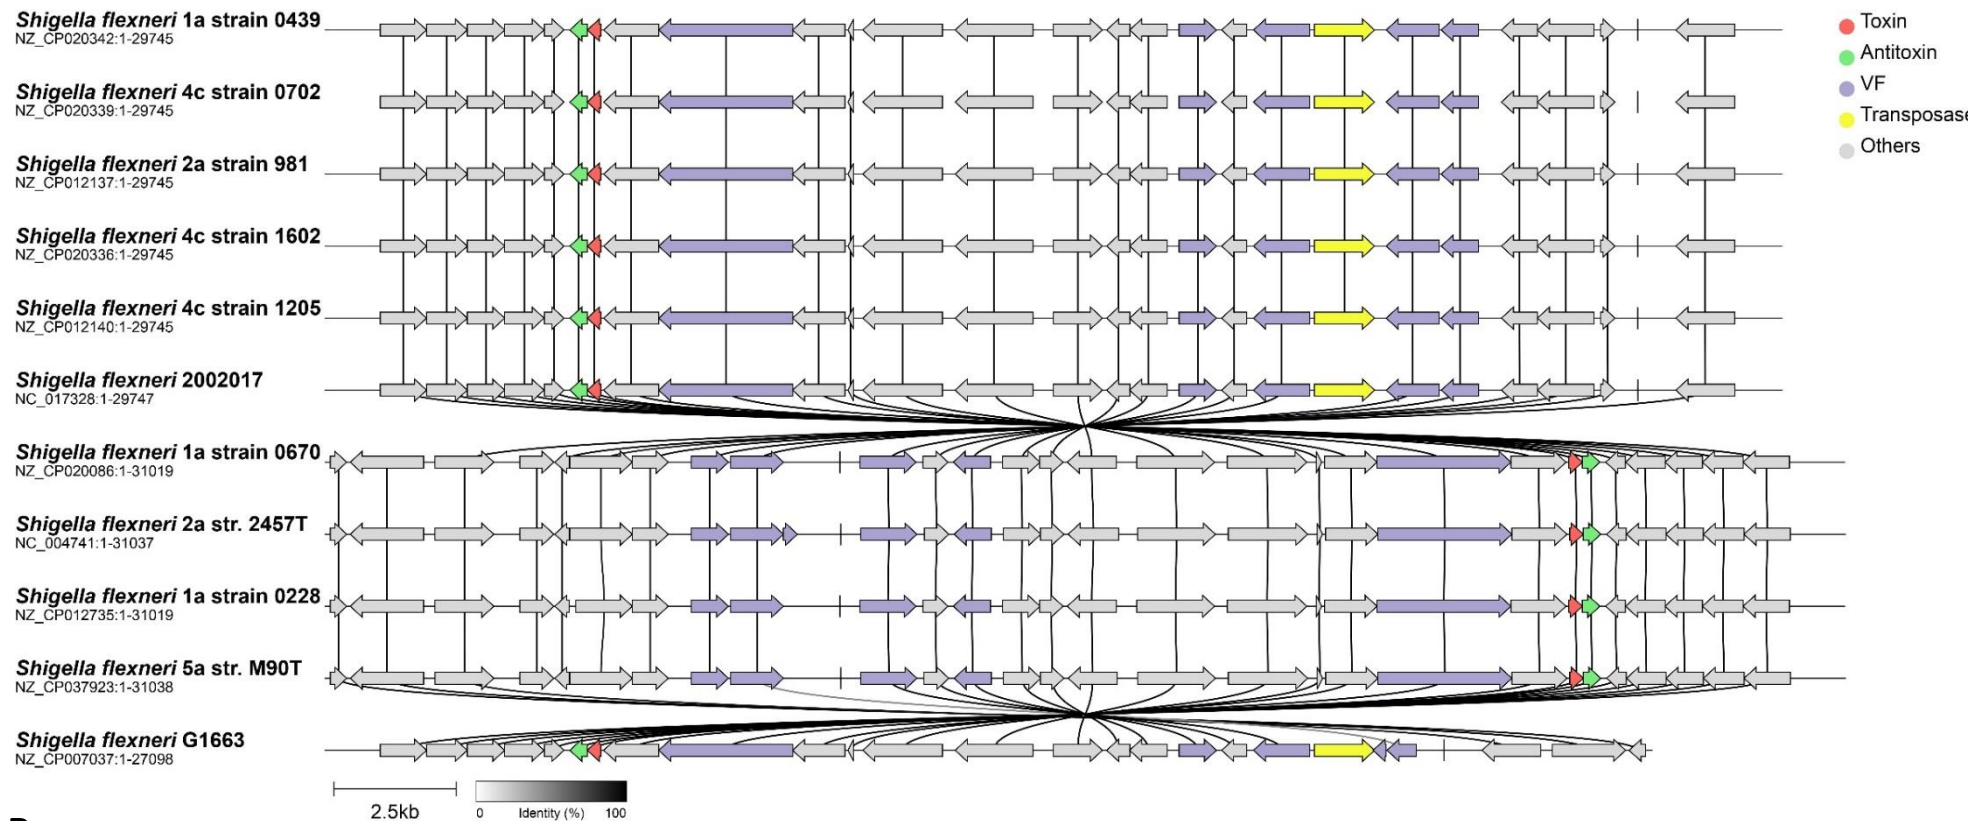

B

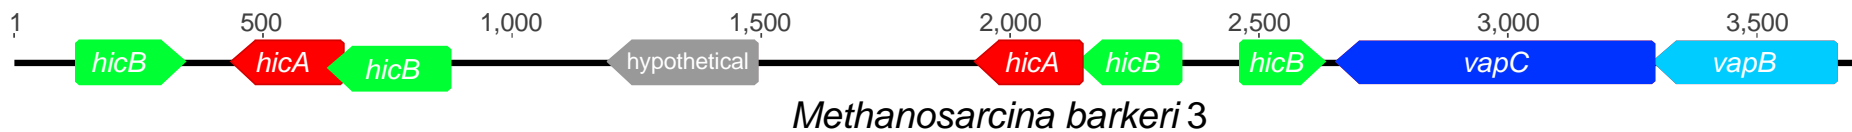

C

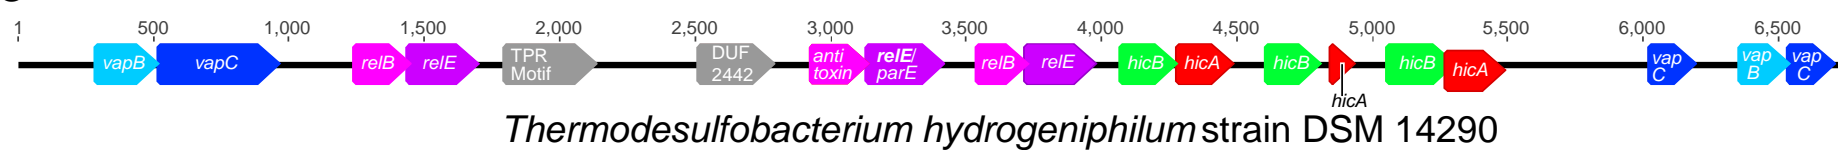

Supplement: mbio.03293-23-s0001.pdf [file mbio.03293-23-s0001.pdf]
